# Supplementary material
Source: PubMed Central journal article supplement (PMC5687836)
Supplement: NIHMS912882-supplement.pdf [file NIHMS912882-supplement.pdf]

## 1 **Supplementary Materials**

2 Supplementary Experimental Procedures.

3 Supplemental Figure 1. Binding of JCV and BKV VLPs to CHO-Based Cell Lines. Related to  
4 Figure 1.

5 Supplemental Figure 2. Flow cytometric analysis of 3Fax- and neuraminidase-treated cells.  
6 Related to Figure 1 and 3, and Supplemental Figure 6.

7 Supplemental Figure 3. SA-mutants are more sensitive to heparin inhibition than wild-type JCV  
8 or BKV. Related to Figure 2.

9 Supplemental Figure 4. SA-mutants are more sensitive to inhibition by HS20 than wild-type JCV  
10 or BKV. Related to Figure 2.

11 Supplemental Figure 5. JCV and BKV pseudovirus transduction is unaffected by reduced  
12 sulfation. Related to Figure 2.

13 Supplemental Figure 6. Neuraminidase treatment of cells enhances SA-mutant infectivity. Related  
14 to Figures 3 and 4.

15 Supplemental Figure 7. siRNA suppression of sialylation enhances the infectivity of a PML-  
16 mutant pseudovirus on ART cells. Related to Figures 3 and 4.

17 Supplemental Table 1. Effect of 3Fax on various cell lines. Related to Figure 3.

18 Supplemental Table 2. Characteristics of pseudovirus stocks. Related to Figures 2-4 and

19 Supplemental Figures 3-7.

20 Supplemental Table 3. Experimental Summary Table. Related to all figures and tables.

21

## 22 **Supplemental Experimental Procedures**

### 23 24 **Cell Lines**

25 ART, SFT, and SNBT cells are “NCI-60” cell lines ADR-RES (an ovarian tumor line), SF-539 (a  
26 gliosarcoma line), and SNB-75 (a glioblastoma line), respectively, that were stably transfected  
27 with an SV40 Large T antigen expression plasmid, pTIH (Buck et al., 2004). Parent cell cultures  
28 were obtained from the NCI DTP Tumor Repository, National Cancer Institute at Frederick, MD.  
29 These cells have been previously described (Ray et al., 2015) and were chosen due to their  
30 infectability by a wide range polyomaviruses, including JCV, BKV, SV40, and MCV. ART, SFT,  
31 and SNBT cells were maintained in R5 medium, which consists of RPMI medium (Invitrogen)  
32 supplemented with 5% FBS (Sigma), Glutamax-I (Invitrogen) and 170, 50, or 25 µg/ml  
33 hygromycin (Invivogen), respectively. Another NCI-60 cell line, A549, was also maintained in  
34 R5. 293TT cells (Buck et al., 2004; Shaw et al., 2002) were maintained in DMEM (Invitrogen)  
35 supplemented with 10% FBS, nonessential amino acids (Invitrogen), Glutamax-I and 250 µg/ml  
36 hygromycin (D10). 293FT cells were purchased from Thermo Fischer (R70007) and maintained  
37 in D10. HSC is an SV40-immortalized human Schwann cell line that was a generous gift from  
38 Ahmet Höke (Lehmann et al., 2012). The HSC line was maintained in D10.

### 39 40 **Pseudovirus and VLP Production**

41 Detailed maps for all expression plasmids used to generate the pseudoviruses and VLPs from this  
42 study are available at our lab website, <http://home.ccr.cancer.gov/LCO/>. PML patient isolates  
43 5228w (wild-type) and 5228m (S269F mutant), described in Ray et al. (Ray et al., 2015), were  
44 chosen as a representative JCV genotype 2 VP1 wild-type and mutant pair. In the current study,  
45 these strains are referred to as JCV2 and JCV2-269F, respectively. Additionally, a wild-type JCV  
46 genotype 3 VP1 and mutant JCV3-L55F were chosen for comparison. All JCV pseudoviruses and  
47 VLPs used consensus VP2 and VP3 minor capsid proteins, which are identical to those of JCV

48 isolate 313B (accession AAK28470). BKV pseudoviruses and VLPs used in this study include a  
49 previously described BKV genotype Ia wild-type VP1 (accession JF894228)(Pastrana et al.,  
50 2013) and a F76W mutant that was incorporated into the BKV Ia VP1 open reading frame by  
51 PCR mutagenesis. Both BKV pseudoviruses and VLPs used the BKV-IV VP2 and VP3  
52 sequences described in Pastrana et al. (Pastrana et al., 2013). SV40 pseudovirus was produced  
53 using the previously described pCAG-SV40 plasmid encoding VP1, VP2, and VP3 (Nakanishi et  
54 al., 2008). MCV pseudovirus and VLPs were produced using VP1 and VP2 plasmids described in  
55 Pastrana et al. (Pastrana et al., 2009).

56 The reporter plasmids used for pseudovirus production encode a secreted version of  
57 NanoLuc luciferase (Hall et al., 2012), derived from pNL1.3 (Promega). The secreted NanoLuc  
58 ORF was moved from pNL1.3 and used to replace HPV16 L1 in the plasmid p16L1-GFP (Buck  
59 et al., 2005) to create phsNuc, which encodes secreted NanoLuc under the control of a minimal  
60 human EF1 $\alpha$  promoter. Likewise, the secreted NanoLuc ORF was cloned into pEGFN-1  
61 (Clontech) to replace EGFP and create pcsNuc, which encodes NanoLuc under the control of the  
62 CMV immediate early promoter. Two separate promoters were used in hope of maximizing  
63 reporter gene expression in different cell lines.

64 Pseudoviruses were produced using previously described methods (Buck et al., 2004;  
65 Pastrana et al., 2009; Ray et al., 2015). All pseudoviruses were prepared using the “Revised  
66 Production” method. Briefly, 21 million 239TT cells were pre-plated overnight in a T225 flask  
67 then transfected with a mixture of plasmids encoding codon modified VP1, VP2, VP3, and the  
68 reporter plasmids pcsNuc and phsNuc at a 2:1:1:1:1 ratio, respectively. The transfection mixture  
69 was left on cells for roughly 16 hours, then removed and replaced with fresh medium. Forty-eight  
70 hours after transfection, cells were trypsinized, collected by centrifugation, and washed once in  
71 Dulbecco’s PBS with calcium and magnesium supplemented with an additional 9.5 mM MgCl<sub>2</sub>  
72 and Pen-Strep-Fungizone (PSF, Invitrogen)(DPBS-Mg). Cells were resuspended in DPBS-Mg at

73 1.4 cell pellet volumes. Neuraminidase V (Sigma N2876) was then added at a final concentration  
74 of 2 U/ml and the cell suspension was incubated at 37°C for 30 minutes. Triton X-100 or Brij-58  
75 was added at 0.5% (v/v) of cell suspension volume and the mixture was incubated at 37°C for 30  
76 minutes. Finally, a 1M pH 9 stock of ammonium sulfate was used to adjust the lysate to 25 mM  
77 ammonium sulfate and an RNase A/T1 cocktail (Ambion) was added at 0.1% of lysate volume.  
78 The buffered lysates were incubated at 37°C overnight to allow capsid maturation. Lysates were  
79 clarified by low speed centrifugation, the pellet was re-extracted with additional PBS, and pooled  
80 clarified material was purified either by ultracentrifugation over an Optiprep gradient (JCV,  
81 MCV, and HPV16) or by agarose gel filtration (BKV and SV40), as previously described (Buck  
82 et al., 2008; Cardone et al., 2014). Stocks were characterized by quantification of reporter plasmid  
83 by qPCR (pseudovirions) using primers targeting NanoLuc (AGATTTCGTTGGGGACTGGCG  
84 and CCGCTCAGACCTTCATACGGG). In some instances, VP1 content of the stock was  
85 characterized by comparison to BSA standards run on Novex SDS-PAGE gels stained with  
86 SYPRO Ruby dye (Invitrogen). Pseudovirus doses used for each figure are shown in  
87 Supplemental Table 2.

88 VLPs were produced in the same manner as pseudoviruses except the NanoLuc reporter  
89 plasmids were omitted from the transfection step and, instead of RNase, lysates were treated with  
90 Benzonase (Sigma) and PlasmidSafe (Epicentre) nucleases. VLPs were purified using Optiprep  
91 gradients.

### 92

### 93 **Synthesis of 3Fax-Peracetyl Neu5Ac**

94 The identity and purity of 3Fax was validated by NMR and mass spectrometry. 3Fax was  
95 dissolved in DMSO at 50 mg/ml and stored at -80 °C. The efficacy of the inhibitor was verified  
96 by culturing cells in a dilution series of 3Fax and using flow cytometry (see below) to evaluate the

97 binding of biotinylated lectins *Sambucus nigra* (SNA, 2 µg/ml) and *Maackia amurensis* II (MAL-  
98 II, 5 µg/ml) (Vector Laboratories).

99

### 00 **VLP Binding Assay with 3Fax and Heparinase I/III Treatment**

01 SFT cells were cultured in R5 with 200 µM 3Fax or the equivalent volume of DMSO (mock  
02 treatment) for 2 days, then trypsinized and replated in a 10 cm<sup>2</sup> tissue culture dish in R5 with 200  
03 µM 3Fax or DMSO. After 2 days, cells were dislodged from the plate using PBS with 10 mM  
04 EDTA and resuspended in wash medium (DPBS with 1% FBS, 10 mM HEPES, and PSF). Cells  
05 were resuspended at 50,000 cells/0.1 ml and both DMSO and 3Fax treated cells were either mock  
06 treated with enzyme buffer (20 mM Tris pH 7.5, 50 mM NaCl, 4 mM CaCl<sub>2</sub>, 0.01% BSA) or 0.02  
07 units of heparinase I/III (Sigma H3917) dissolved in enzyme buffer. All conditions were  
08 incubated at 37 °C for 1 h in a water bath with gentle mixing every 10 minutes. Following the  
09 incubation, 100 µl of cell suspension from each treatment condition was transferred to a 96-well  
10 plate and washed once in wash medium. Cells were incubated with 50 ng of VLPs for 1 h at 4 °C  
11 with rocking and, after two washes in wash medium, incubated with primary antibody (1:1000)  
12 for 30 min at 4 °C. Primary antibodies used include: mouse-anti-JCV polyclonal sera (Ray et al.,  
13 2015), mouse-anti-BKV polyclonal sera (Pastrana et al., 2013), rabbit-anti-MCV polyclonal sera  
14 (Pastrana et al., 2009), mouse-anti-HPV polyclonal sera (a generous gift from Hanna Seitz and  
15 John Schiller, NCI). Additionally, anti-heparan sulfate mAb HS20 (0.5 µg/ml) or a combination  
16 of biotinylated SNA (2 µg/ml) and MAL-II (5 µg/ml) lectins were added to measure the effect of  
17 the 3Fax treatment on surface expression of heparan sulfate and sialic acid, respectively. After  
18 two washes, cells were incubated with the appropriate Alexa Fluor 488 conjugated secondary  
19 antibody (Invitrogen) or, for the lectins, with streptavidin conjugated to Alexa Fluor 488  
20 (Invitrogen). After two final washes, cells were resuspended in 225 µl of wash medium and Alexa

21 Fluor 488 signal was measured by flow cytometry using a BD FACSCanto II. Cytometry was  
22 analyzed using FlowJo software.

23

#### 24 **Heparin Inhibition Assay**

25 ART, SFT, or 293TT cells were trypsinized and plated in 96-well plates at 5,000 cells/well in 100  
26  $\mu$ l, avoiding usage of the evaporation-prone outer wells of the plate. Heparin (Sigma H4784) was  
27 reconstituted in PBS and a 1:2 dilution series of heparin at 4x the desired final concentration was  
28 diluted in R5 media, and added to cells in 50  $\mu$ l in quintuplicate. The pseudovirus inoculum was  
29 added to cells in 50  $\mu$ l of R5 medium, bringing the final volume in each well to 200  $\mu$ l. After  
30 incubation at 37 °C for five days (BKVs) or six days (JCVs), 25  $\mu$ l of supernatant was transferred  
31 to white luminometry plates (Perkin-Elmer), mixed with 50  $\mu$ l of NanoLuc working substrate  
32 diluted 1:5 in PBS and signal was read using a POLARstar Optima luminometer (BMG), typically  
33 with gain set at 3200.

34 The heparin inhibition assay was also performed with 3Fax-treated cells. SFT cells were  
35 cultured in 200  $\mu$ M 3Fax or an equivalent volume of DMSO for two days, trypsinized and  
36 replated with 3Fax or DMSO in 96-well plates at 5,000 cells/well. For both 3Fax and DMSO  
37 treated cells, virus was added (Supplemental Table 2) in 50  $\mu$ l to all cells, and either 50  $\mu$ l R5 or a  
38 single dose of heparin (100  $\mu$ g/ml) was added, to bring the final volume to 200  $\mu$ l. After six days,  
39 supernatant was harvested and NanoLuc signal was measured as described above.

40

#### 41 **HS20 Neutralization Assay**

42 Purified HS20 was a generous gift from M. Ho and W. Gao (Antibody Therapy Section,  
43 Laboratory of Molecular Biology, NCI). ART or SFT cells were trypsinized and plated in 96-well  
44 plates at 5,000 cells/well in 50  $\mu$ l, avoiding usage of the evaporation-prone outer wells of the  
45 plate. A 1:3 dilution series of HS20 at 4x the desired final concentration was made in R5 media,

46 and added to cells in 25  $\mu$ l in quintuplicate. Virus was diluted in R5 and added to cells in 25  $\mu$ l.  
47 After incubation at 37°C for four days, 25  $\mu$ l of supernatant was transferred to white luminometry  
48 plates and luminescent signal read as described for the heparin inhibition assay.

49

#### 50 **Transduction of Sodium Chlorate-Treated A549**

51 A549 cells were cultured in R5 supplemented with or without 50 mM sodium chlorate (Sigma)  
52 for three days, trypsinized, and replated in R5 with or without 50 mM sodium chlorate at 5,000  
53 cells/well in 100  $\mu$ l. Virus was diluted in R5 and added in 25  $\mu$ l in quadruplicate to cells. Infection  
54 was allowed to proceed for six days, and then 25  $\mu$ l of supernatant was transferred to a white  
55 luminometry plate and luminescent signal read as described for the heparin inhibition assay.

56

#### 57 **Cell Binding Assay with H2B-NanoLuc (H2BN) VLPs**

58 JCV VLPs carrying an encapsidated histone H2B-NanoLuc fusion protein (H2BN) were  
59 generated by inclusion of plasmid pH2BN in the VLP transfection mix (see above). The H2BN  
60 ORF was generated using PCR to recombine segments of pNL1.1CMV (Promega), plasmid pW<sub>M</sub>  
61 (Tolstov et al., 2009), and pBOS-H2BGFP (BD Pharmingen) (Kanda et al., 1998). Sequencing  
62 revealed that the H2B gene in pBOS-H2BGFP contained two non-silent mutations (D26G and  
63 V119I). The errors were reverted to wild-type by overlap PCR.

64

#### 65 **Hemagglutination Assay**

66 JCV-1A VLPs were diluted to 0.1 ng/ $\mu$ l in PBS and added to pre-chilled 96-well round bottom  
67 wells in 20  $\mu$ l volume. A 1:5 dilution series of anti-JCV VP1 mAbs was made in PBS starting at  
68 50 ng/ $\mu$ l and 20  $\mu$ l of each antibody dilution was added to the round-bottom wells. Type O+ red  
69 blood cells (RBCs) were washed three times in ice cold PBS. Ten  $\mu$ l of a 5% (v/v) suspension of  
70 RBCs in chilled DPBS was added to pre-chilled 96-well round bottom wells containing the

71 VLP/antibody mixtures. RBCs were resuspended by trituration and plates were placed on ice  
72 overnight.

73

#### 74 **Statistical Analysis**

75 Graphpad Prism software was used to estimate EC<sub>50</sub> values by fitting a sigmoidal dose-response  
76 curve with variable slope. The top and bottom of the curve were fixed at 100% neutralization or  
77 0% neutralization, respectively.

78



| TUBE NAME          | Geometric Mean : FITC-A |
|--------------------|-------------------------|
| CHO w/ JCV2        | 265                     |
| Lec2 w/ JCV2       | 104                     |
| pgsA w/ JCV2       | 126                     |
| CHO antibody only  | 2.34                    |
| Lec2 antibody only | 2.08                    |
| pgsA antibody only | 1.91                    |

| TUBE NAME          | Geometric Mean : FITC-A |
|--------------------|-------------------------|
| CHO w/ BKV-1a      | 158                     |
| Lec2 w/ BKV-1a     | 36.9                    |
| pgsA w/ BKV-1a     | 76.1                    |
| CHO antibody only  | 2.09                    |
| Lec2 antibody only | 1.97                    |
| pgsA antibody only | 1.96                    |

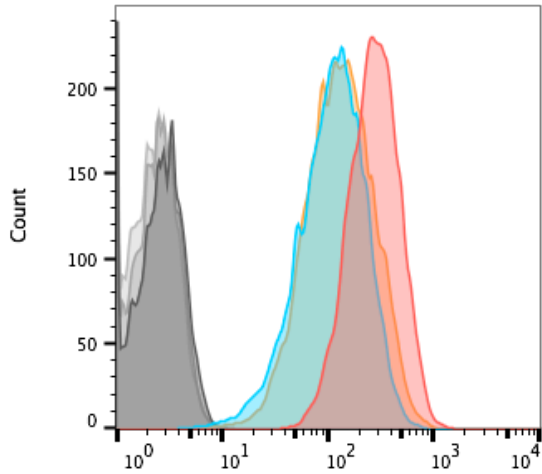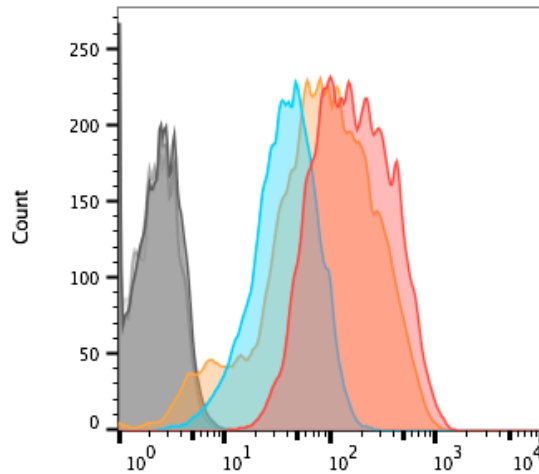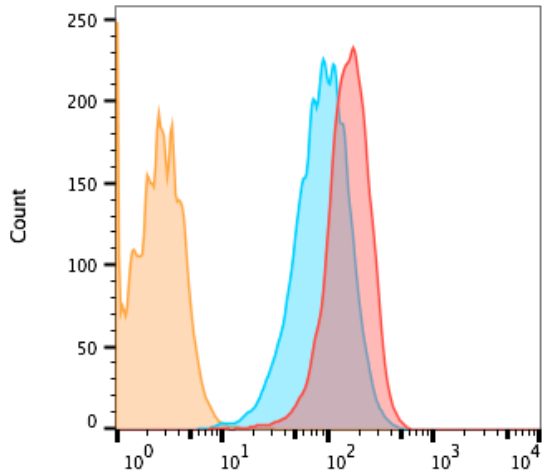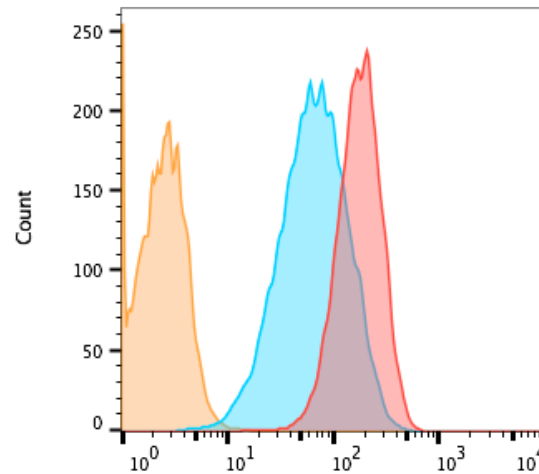

| TUBE NAME         | Geometric Mean : FITC-A |
|-------------------|-------------------------|
| CHO w/ JCV2-269F  | 150                     |
| Lec2 w/ JCV2-269F | 85.0                    |
| pgsA w/ JCV2-269F | 2.23                    |

| TUBE NAME       | Geometric Mean : FITC-A |
|-----------------|-------------------------|
| CHO w/ BKV-76W  | 169                     |
| Lec2 w/ BKV-76W | 63.1                    |
| pgsA w/ BKV-76W | 2.07                    |

79

80 **Supplemental Figure 1. Binding of JCV and BKV VLPs to CHO-Based Cell Lines. Related**  
 81 **to Figure 1.** JCV and BKV VLPs were incubated with CHO, Lec2 (which lack sialic acid), or  
 82 pgsA-745 (which lack GAGs) and binding was detected using anti-VP1 antibodies. Results are  
 83 representative of three independent experiments.

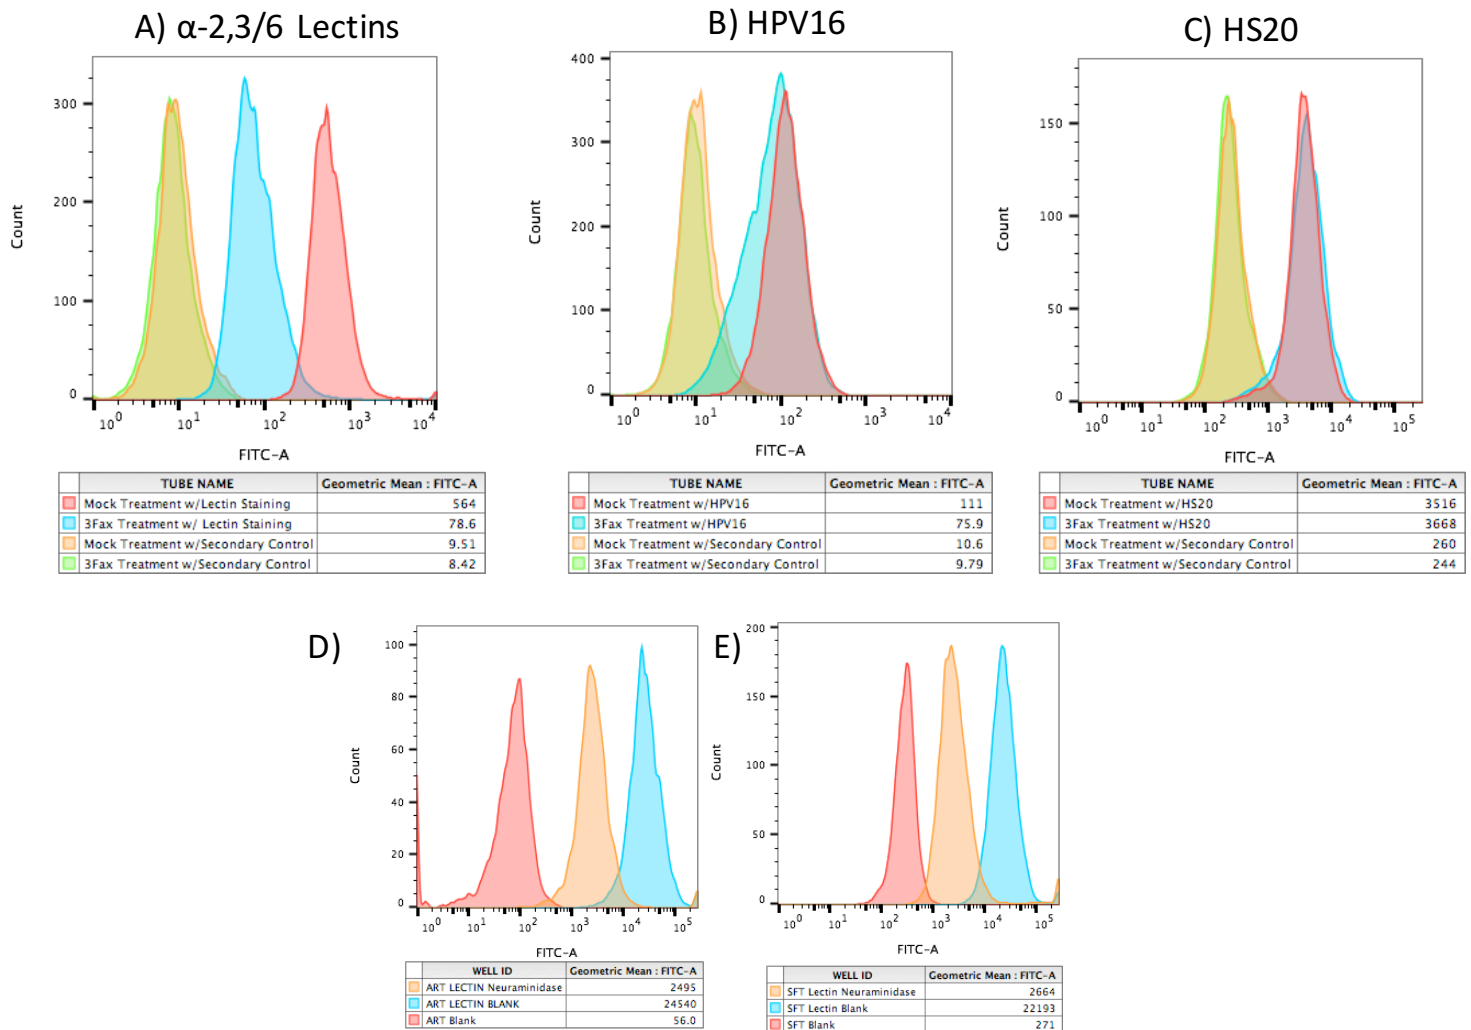

84  
85  
86  
87  
88  
89  
90  
91  
92

**Supplemental Figure 2. Flow cytometric analysis of 3Fax- and neuraminidase-treated cells. Related to Figure 1 and 3, and Supplemental Figure 6.** Panels (A-C): SFT cells were cultured in DMSO (mock treatment) or 3Fax for 3 days and then incubated with (A) biotinylated lectins specific for  $\alpha$ -2,3- and  $\alpha$ -2,6-linked sialic acids, (B) HPV16 VLPs, or (C) the anti-heparan sulfate mAb HS20. Panels (D) and (E): ART or SFT cells were incubated with neuraminidase for one hour and stained with lectins. Secondary-only controls (Alexa Fluor 488-labeled streptavidin without lectins or Alexa Fluor 488 goat-anti-mouse secondary without anti-HPV16 primary, or without HS20) are shown. Results are representative of three independent experiments.

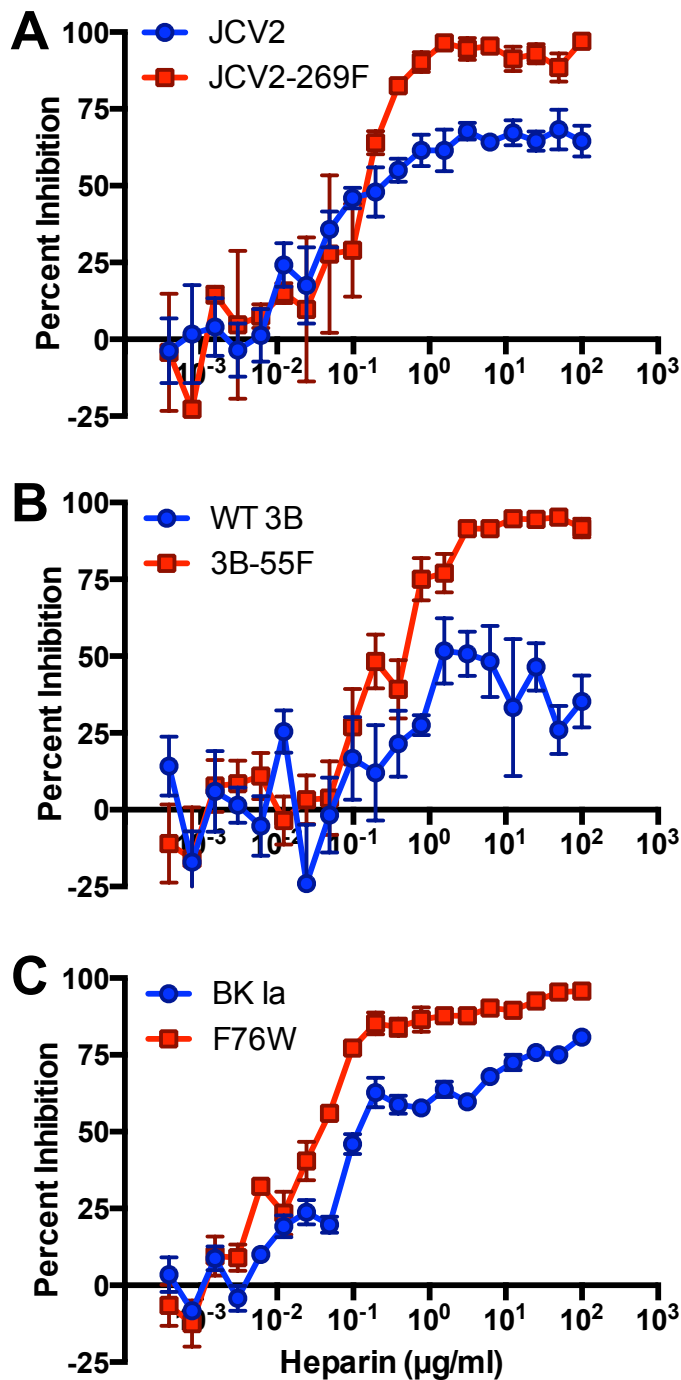

93  
 94 **Supplemental Figure 3. SA-mutants are more sensitive to heparin inhibition than wild-type**  
 95 **JCV or BKV. Related to Figure 2.** Infectivity of indicated pseudoviruses was measured in the  
 96 presence of a two-fold dilution series of heparin on SFT cells. Results are normalized to a “no  
 97 heparin” control and are an average of quintuplicate values. Error bars represent SEM.

ART

SFT

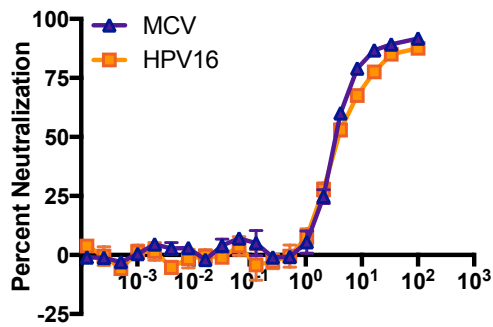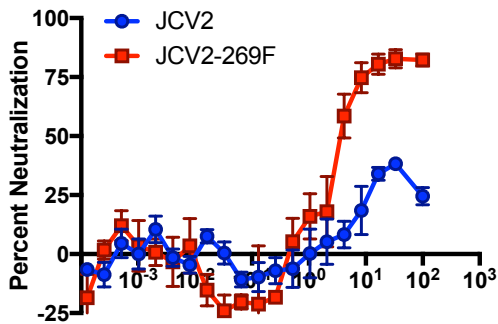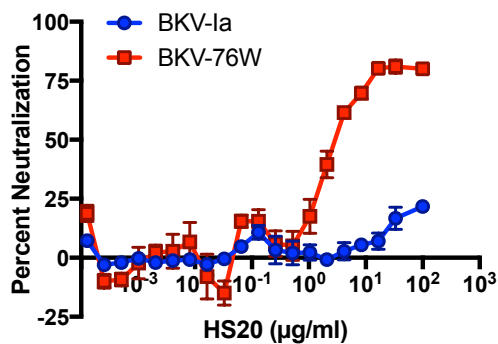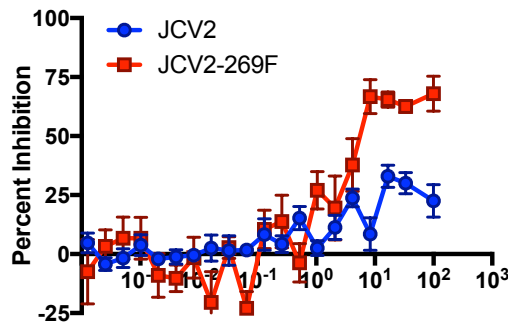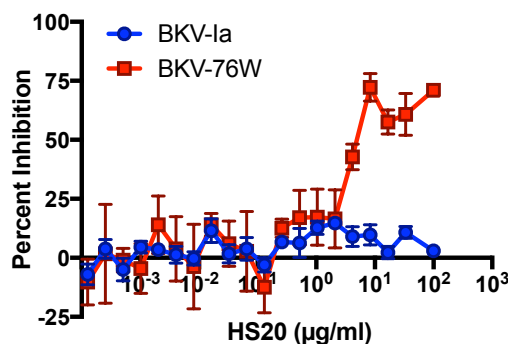

98

99

**Supplemental Figure 4. SA-mutants are more sensitive to inhibition by the GAG-blocking mAb HS20 than wild-type JCV or BKV. Related to Figure 2.** A complementary approach to establishing the GAG-dependency of polyomavirus infectious entry used HS20, a mAb originally identified based on its ability to bind heparan sulfate chains displayed on the liver cancer antigen glypican-3 (Gao et al., 2014; Gao et al., 2015a; Gao et al., 2015b). HS20 effectively blocked the infectivity of MCV and human papillomavirus type 16 (HPV16), both of which are known to require GAGs for cell attachment (row A). The SA-mutants were likewise almost completely neutralized by HS20 (red points, rows B and C). In contrast, the infectivity of wild-type JCV2 and wild-type BKV were only modestly affected by HS20, even at the highest tested concentrations (blue points, rows B and C). The results, performed on both ART (left panels) and SFT (right panels) cells, confirm that SA-mutant viruses depend on engagement of GAGs for infectious entry and that wild-type JCV and BKV can remain infectious when GAG engagement is blocked. The infectivity of indicated pseudoviruses was measured in the presence of a three-fold dilution series of HS20 (x-axes). Background signal (no virus) was subtracted from all results and quintuplicate values were averaged and expressed as percent inhibition compared to untreated virus control. Error bars represent SEM. Results are representative of three independent experiments.

15

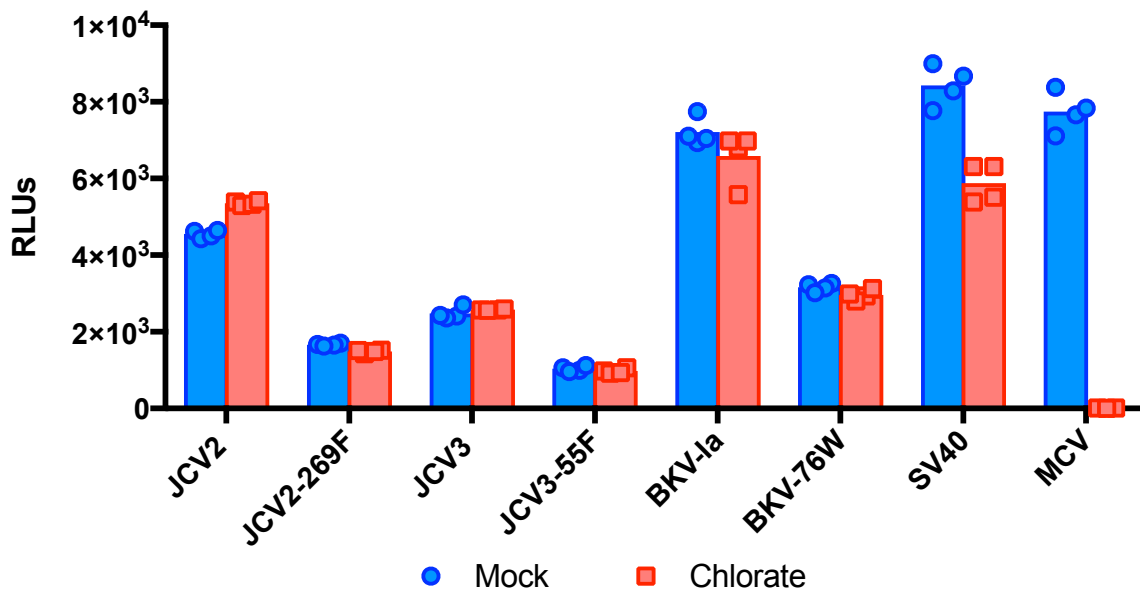

16  
17  
18  
19  
20  
21  
22  
23  
24  
25  
26  
27  
28  
29  
30  
31  
32

**Supplemental Figure 5. JCV and BKV pseudovirus transduction is unaffected by hypo-sulfation. Related to Figure 2.** MCV infectious entry is known to require the presence of sulfate modifications both on the GAGs the virus uses to attach to cells and on the sialylated co-receptor glycans required for post-attachment entry steps (Schowalter et al., 2011). To determine whether JCV or BKV infectivity depends on sulfate modifications, cells were treated with sodium chlorate, which serves as a competitive inhibitor of both N- and O-sulfation (Bauerle and Huttner, 1986). The infectivity of an MCV pseudovirus was used as a control for the effectiveness of chlorate treatment for blocking GAG sulfation. By this measure, A549 cells (but not ART, SFT, SNBT, or 293TT cells) were confirmed (Schowalter et al., 2011) to be sensitive to chlorate treatment. The infectivity of all tested JCV and BKV pseudoviruses was unaffected by the chlorate treatment of A549 cells. The results suggest that, in contrast to MCV, JCV and BKV do not require interactions with sulfate groups. It is unclear whether this reflects an insensitivity to the presence of sulfate groups or the two viruses are instead specifically interacting with non-sulfated segments of these complex glycans. A549 cells were cultured in sodium chlorate for three days and the infectivity of a panel of pseudoviruses was measured and compared to untreated cells. Similar results were observed in a total of three independent experiments.

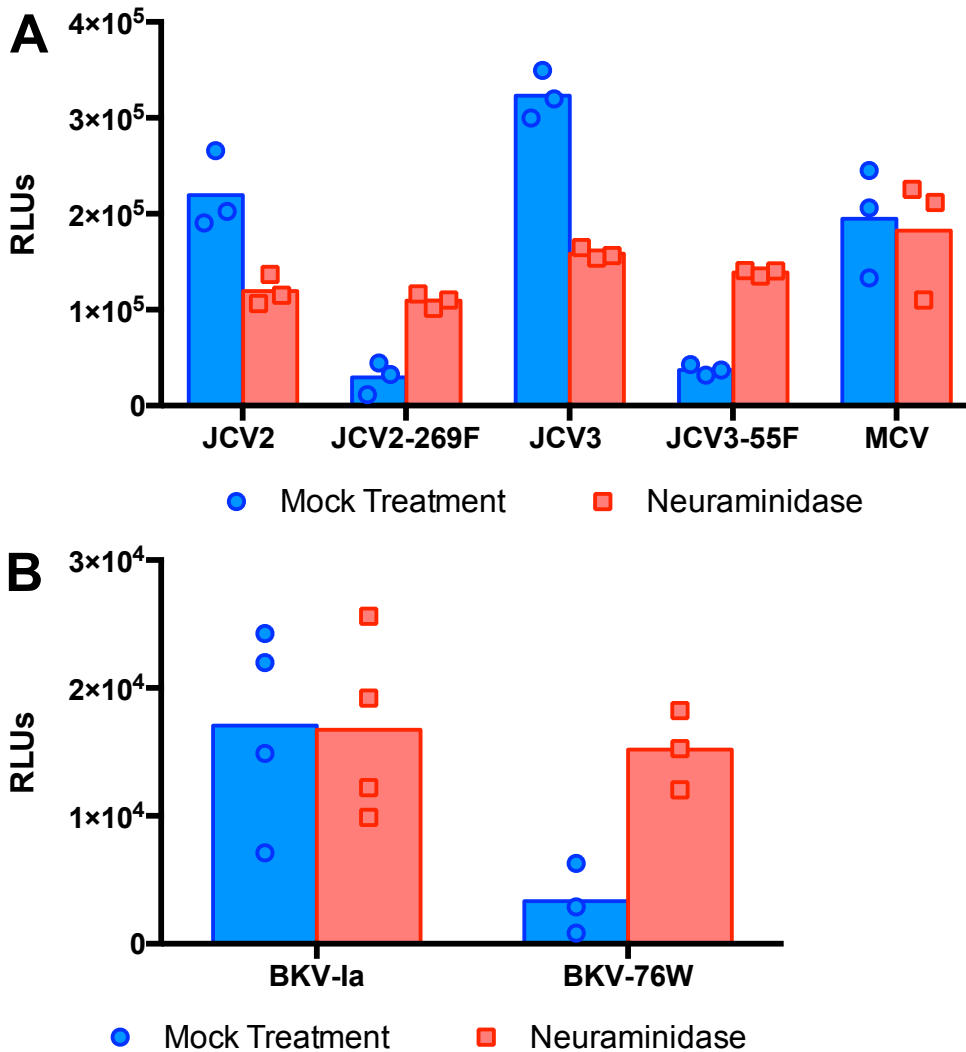

33

**Supplemental Figure 6. Neuraminidase treatment of cells enhances SA-mutant infectivity.**

**Related to Figures 3 and 4.** To confirm that the enhancement of PML-mutant infection observed on 3Fax-treated SFT cells was due to the production of hypo-sialylated glycans (as opposed to an unknown off-target effect of 3Fax), cells were treated with a neuraminidase to enzymatically remove sialic acid residues from existing surface glycans. The enzymatic treatment was effective, as measured by decreased lectin staining (Supplemental Figure 1A). The neuraminidase treatment modestly inhibited the infectivity of wild-type pseudoviruses and enhanced the infectivity of SA-mutant pseudoviruses by roughly 3-fold. SFT cells were treated with neuraminidase or mock-treated for 1 hour at 37° C and then plated in R5 and infected with indicated pseudoviruses. Reporter signal was measured after six days. Results are representative of three independent experiments. Similar results were observed for ART cells (data not shown).

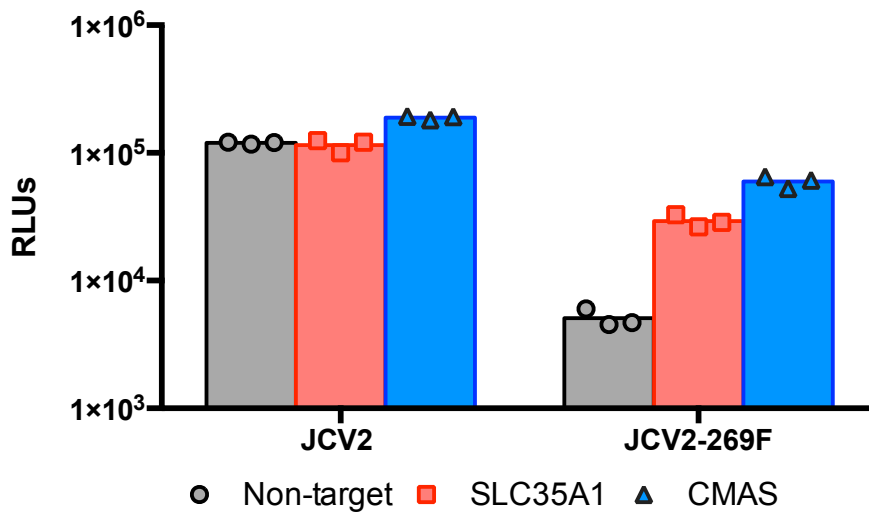

45  
46  
47  
48  
49  
50  
51  
52  
53  
54  
55  
56  
57  
58

**Supplemental Figure 7. siRNA suppression of sialylation enhances the infectivity of a PML-mutant pseudovirus on ART cells. Related to Figures 3 and 4.** To further confirm that suppression of sialylation enhances PML-mutant infectivity, siRNAs were used to target two genes in the sialyl-glycan biosynthetic pathway, SLC35A1 and CMAS. Attempts at silencing these genes in ART cells resulted in a modest (~40%) reduction of lectin staining (data not shown). Despite the relatively modest reduction in sialylated glycan synthesis, the infectivity of JCV2-269F was enhanced by an average of 4.5 fold when SLC35A1 was silenced and 8.5 fold when CMAS was silenced. The infectivity of the wild-type JCV2 pseudovirus was unaffected by either siRNA, presumably reflecting the ability of JCV2 to utilize the remaining sialylated glycans at the cell surface. Cells were transfected twice with siRNAs targeting either SLC35A1 or CMAS, and then replated and transduced with JCV2 or JCV2-269F pseudoviruses. Similar results were obtained in two independent experiments.

| Cell line | Putative tissue of tumor origin | Percent reduction in lectin staining | JCV2-269F (fold increase) | JCV3-55F (fold increase) |
|-----------|---------------------------------|--------------------------------------|---------------------------|--------------------------|
| ART       | Ovary                           | 14%                                  | 1.4                       | nt                       |
| 293FT     | Neuronal                        | 57%                                  | 3.9                       | 5.1                      |
| 293TT     | Neuronal                        | 57%                                  | 3.9                       | 5.6                      |
| HSC       | Schwann cell                    | 63%                                  | 7.2                       | 11.1                     |
| SFT       | Gliosarcoma                     | 81%                                  | 14.9                      | 20.5                     |
| SNBT      | Glioblastoma                    | 86%                                  | 4.1                       | 3.1                      |

59

60

61

62

63

64

65

66

67

68

69

70

71

72

73

74

**Supplemental Table 1. Effect of 3Fax on various cell lines. Related to Figure 3.** Cell lines were cultured in medium with 200  $\mu$ M 3Fax or the equivalent volume of DMSO for 3 days, then dislodged from tissue culture plates with PBS with 10 mM EDTA. Cells were stained with a mixture of lectins recognizing alpha-2,3 and alpha-2,6 sialylated glycans and flow cytometry was performed to determine the percent decrease in lectin staining compared to mock-treated cells. 3Fax-treated cells were also used to evaluate the effect of decreased sialylated glycan expression on the infectivity of PML-mutant JCV strains. For the infectivity experiment, 3Fax- or mock-treated cells were trypsinized and replated in 96-well plates at 5,000 cells/well with the appropriate amount of 3Fax or DMSO. Replated cells were then inoculated with pseudovirions carrying secreted NanoLuc reporter plasmids. NanoLuc signal in the culture supernatant was measured six days after inoculation. The fold enhancement of luminometric signal for JCV2-269F and JCV3-55F (PML-mutant) pseudovirions on 3Fax-treated cells relative to DMSO-treated control cells was determined. nt = not tested.



| Pseudovirus | Figures 2-3,<br>S. Figure 3-5 | Figure 4 | Figure 5 | S. Figure 6 | S. Figure 7 | S .Table 1 |
|-------------|-------------------------------|----------|----------|-------------|-------------|------------|
| JCV2        | 8.2E+04                       | 6.0E+03  | 4.63E+04 | 9.5E+04     | 4.6E+04     | -          |
| JCV2-269F   | 5.0E+05                       | 4.4E+05  | 8.76E+04 | 9.4E+05     | 4.4E+05     | 1.8E+06    |
| JCV3        | 3.0E+04                       | 9.3E+03  | 2.86E+04 | 6.2E+04     | -           | -          |
| JCV3-55F    | 3.7E+05                       | 3.7E+05  | 1.18E+05 | 1.1E+06     | -           | 1.5E+06    |
| JCV-IA      | -                             | -        | 6.03E+04 | -           | -           | -          |
| BKV-1a      | 2.2E+04                       | -        | -        | 1.0E+05     | -           | -          |
| BKV-76W     | 1.2E+05                       | -        | -        | 2.4E+05     | -           | -          |
| SV40        | 5.4E+04                       | -        | -        | -           | -           | -          |
| MCV         | 6.2E+05                       | -        | -        | 6.2E+05     | -           | -          |
| HPV16       | 6.2E+05                       | -        | -        | -           | -           | -          |

75 **Supplemental Table 2. Characteristics of pseudovirus stocks. Related to Figures 2-5,**  
76 **Supplemental Figures 3-7, Supplemental Table 1.** The table shows the number of copies of  
77 NanoLuc reporter gene (in the form of purified pseudovirions) used for each 96-well of cells.  
78 Pseudovirus stocks collected using Triton X-100 were used for Figures 2-3 and Supplemental  
79 Figures (SF) 3-5, stocks collected using Brij-58 were used for Figure 4, Figure 5, and  
80 Supplemental Figures 6-7, and Supplemental Table 1.  
81  
82

|                       | Figure legend title                                                                                                       | BKV Ia and F76W | JCV2 and JCV2-269F | JCV3 and JCV3-55F | SV40                     | MCV      | HPV16    | Other            | Cell lines                                                        |
|-----------------------|---------------------------------------------------------------------------------------------------------------------------|-----------------|--------------------|-------------------|--------------------------|----------|----------|------------------|-------------------------------------------------------------------|
| Figure 1              | SA-mutant VLPs require GAGs for binding to SFT gliosarcoma cells.                                                         | +               | +                  | -                 | -                        | +        | -        |                  | SFT; ART not responsive to 3Fax                                   |
| Figure 2              | SA-mutant pseudoviruses are more sensitive to heparin inhibition than wild-type pseudoviruses.                            | +               | +                  | +                 | +                        | -        | -        |                  | ART, SFT (Supplemental Figure 2), SNBT and 293TT (data not shown) |
| Figure 3              | JCV and BKV pseudovirions make facultative use of either sialylated glycans or by heparin-like GAGs for infectious entry. | +               | +                  | +                 | +                        | +        | +        |                  | SFT and SNBT (data not shown); ART not responsive to 3Fax         |
| Figure 4              | Addition of asialo-GM1 enhances the infectivity of PML-mutant JCV strains.                                                | -               | +                  | +                 | + (SFT - data not shown) | -        | -        |                  | ART and SFT (data not shown)                                      |
| Figure 5              | Neutralization properties of anti-JCV mAbs on 3Fax-treated SFT cells.                                                     | -               | +                  | +                 | -                        | -        | -        | Mad1             | 3Fax treated SFT; untreated SFT and ART (data not shown)          |
| Figure 6              | Neutralizing mAbs do not prevent JCV attachment to cells.                                                                 | -               | +                  | +                 | -                        | -        | -        | Heparin and HS20 | ART (data not shown) and SFT                                      |
| Figure 7              | Model for infectious entry of JCV.                                                                                        | -               | -                  | -                 | -                        | -        | -        |                  |                                                                   |
| Supplemental Figure 1 | Binding of JCV and BKV VLPs to CHO-Based Cell Lines.                                                                      | +               | +                  | -                 | -                        | -        | -        |                  | CHO, Lec2 (no sialic acid), pgsA (no GAGs)                        |
| Supplemental Figure 2 | Flow cytometric analysis of 3Fax- and neuraminidase-treated cells.                                                        | -               | -                  | -                 | -                        | -        | +        | Lectins and HS20 | ART and SFT                                                       |
| Supplemental Figure 3 | SA-mutants are more sensitive to heparin inhibition than wild-type JCV or BKV.                                            | +               | +                  | +                 | -                        | -        | -        |                  | SFT                                                               |
| Supplemental Figure 4 | SA-mutants are more sensitive to inhibition by HS20 than wild-type JCV or BKV.                                            | +               | +                  | -                 | -                        | ART Only | ART Only |                  | ART and SFT                                                       |
| Supplemental Figure 5 | JCV and BKV pseudovirus transduction is unaffected by reduced sulfation.                                                  | +               | +                  | +                 | +                        | +        | -        |                  | A549                                                              |
| Supplemental Figure 6 | Neuraminidase treatment of cells enhances SA-mutant infectivity.                                                          | +               | +                  | +                 | -                        | +        | -        |                  | SFT and ART (data not shown)                                      |
| Supplemental Figure 7 | siRNA suppression of sialylation enhances the infectivity of a PML-mutant pseudovirus on ART cells.                       | -               | +                  | -                 | -                        | -        | -        | Lectins          | ART; SFT not responsive to siRNA knockdown                        |
| Supplemental Table 1  | Effect of 3Fax on various cell lines.                                                                                     | -               | JCV2-269F Only     | JCV3-55F Only     | -                        | -        | -        |                  | ART, 293TT, 293FT, SFT, SNBT, HSC                                 |

83  
84  
85  
86  
87

**Supplemental Table 3. Experimental Summary Table. Related to all figures and tables.** The table lists all reported experiments and summarizes which viruses and cell lines were used in each experiment.

## 88 References

- 89
- 90 Baeuerle, P.A., and Huttner, W.B. (1986). Chlorate--a potent inhibitor of protein sulfation in intact cells. *Biochemical*  
91 *and biophysical research communications* *141*, 870-877.
- 92 Buck, C.B., Cheng, N., Thompson, C.D., Lowy, D.R., Steven, A.C., Schiller, J.T., and Trus, B.L. (2008).  
93 Arrangement of L2 within the papillomavirus capsid. *Journal of Virology* *82*, 5190-5197.
- 94 Buck, C.B., Pastrana, D.V., Lowy, D.R., and Schiller, J.T. (2004). Efficient intracellular assembly of papillomaviral  
95 vectors. *Journal of Virology* *78*, 751-757.
- 96 Buck, C.B., Thompson, C.D., Pang, Y.-Y.S., Lowy, D.R., and Schiller, J.T. (2005). Maturation of papillomavirus  
97 capsids. *Journal of ...* *79*, 2839-2846.
- 98 Cardone, G., Moyer, A.L., Cheng, N., Thompson, C.D., Dvoretzky, I., Lowy, D.R., Schiller, J.T., Steven, A.C., Buck,  
99 C.B., and Trus, B.L. (2014). Maturation of the human papillomavirus 16 capsid. *mBio* *5*, e01104-01114.
- 00 Gao, W., Kim, H., Feng, M., Phung, Y., Xavier, C.P., Rubin, J.S., and Ho, M. (2014). Inactivation of Wnt signaling  
01 by a human antibody that recognizes the heparan sulfate chains of glypican-3 for liver cancer therapy. *Hepatology* *60*,  
02 576-587.
- 03 Gao, W., Kim, H., and Ho, M. (2015a). Human Monoclonal Antibody Targeting the Heparan Sulfate Chains of  
04 Glypican-3 Inhibits HGF-Mediated Migration and Motility of Hepatocellular Carcinoma Cells. *PloS one* *10*,  
05 e0137664-e0137664.
- 06 Gao, W., Tang, Z., Zhang, Y.F., Feng, M., Qian, M., Dimitrov, D.S., and Ho, M. (2015b). Immunotoxin targeting  
07 glypican-3 regresses liver cancer via dual inhibition of Wnt signalling and protein synthesis. *Nature communications*  
08 *6*, 6536.
- 09 Hall, M.P., Unch, J., Binkowski, B.F., Valley, M.P., Butler, B.L., Wood, M.G., Otto, P., Zimmerman, K., Vidugiris,  
10 G., Machleidt, T., *et al.* (2012). Engineered Luciferase Reporter from a Deep Sea Shrimp Utilizing a Novel  
11 Imidazopyrazinone Substrate. *ACS Chemical Biology* *7*, 1848-1857.
- 12 Kanda, T., Sullivan, K.F., and Wahl, G.M. (1998). Histone-GFP fusion protein enables sensitive analysis of  
13 chromosome dynamics in living mammalian cells. *Curr Biol* *8*, 377-385.
- 14 Lehmann, H.C., Chen, W., Mi, R., Wang, S., Liu, Y., Rao, M., and Hoke, A. (2012). Human Schwann cells retain  
15 essential phenotype characteristics after immortalization. *Stem Cells Dev* *21*, 423-431.
- 16 Nakanishi, A., Chapellier, B., Maekawa, N., Hiramoto, M., Kuge, T., Takahashi, R.U., Handa, H., and Imai, T.  
17 (2008). SV40 vectors carrying minimal sequence of viral origin with exchangeable capsids. *Virology* *379*, 110-117.
- 18 Pastrana, D.V., Ray, U., Magaldi, T.G., Schowalter, R.M., Çuburu, N., and Buck, C.B. (2013). BK polyomavirus  
19 genotypes represent distinct serotypes with distinct entry tropism. *Journal of virology* *87*, 10105-10113.
- 20 Pastrana, D.V., Tolstov, Y.L., Becker, J.C., Moore, P.S., Chang, Y., and Buck, C.B. (2009). Quantitation of human  
21 seroresponsiveness to Merkel cell polyomavirus. *PLoS pathogens* *5*, e1000578-e1000578.
- 22 Ray, U., Cinque, P., Gerevini, S., Longo, V., Lazzarin, A., Schippling, S., Martin, R., Buck, C.B., and Pastrana, D.V.  
23 (2015). JC polyomavirus mutants escape antibody-mediated neutralization. *Science translational medicine* *7*,  
24 306ra151-306ra151.
- 25 Schowalter, R.M., Pastrana, D.V., and Buck, C.B. (2011). Glycosaminoglycans and sialylated glycans sequentially  
26 facilitate Merkel cell polyomavirus infectious entry. *PLoS pathogens* *7*, e1002161-e1002161.
- 27 Shaw, G., Morse, S., Ararat, M., and Graham, F.L. (2002). Preferential transformation of human neuronal cells by  
28 human adenoviruses and the origin of HEK 293 cells. *FASEB J* *16*, 869-871.
- 29 Tolstov, Y.L., Pastrana, D.V., Feng, H., Becker, J.C., Jenkins, F.J., Moschos, S., Chang, Y., Buck, C.B., and Moore,  
30 P.S. (2009). Human Merkel cell polyomavirus infection II. MCV is a common human infection that can be detected  
31 by conformational capsid epitope immunoassays - Tolstov - 2009 - International Journal of Cancer - Wiley Online  
32 Library. *International Journal of Cancer* *125*, 1250-1256.

33
